# Supplementary material for: Solvent-assisted selective detection of sub-micromolar levels of Cu2+ions in aqueous samples and live-cells
Source: Royal Society of Chemistry journal article supplement (doi:10.1039/c2an36339a), 2012-12-05
Supplement: c2an36339a.pdf [file c2an36339a.pdf]

## Electronic Supplementary Information

### Solvent assisted selective detection of sub-micromolar levels of Cu<sup>2+</sup> ions in aqueous samples and live-cells

Narendra Reddy Chereddy<sup>a</sup>, Subramaniyan Janakipriya<sup>a</sup>, Purna Sai Korrapati<sup>b</sup>, Sathiah Thennarasu<sup>\*a</sup> and Asit Baran Mandal<sup>\*c</sup>

<sup>a</sup>Organic Chemistry Division, <sup>b</sup>Biomaterials Laboratory, <sup>c</sup>Chemical Laboratory, CSIR-Central Leather Research Institute, Adyar, Chennai-600 020, India

Corresponding author Tel.: +91 44 24913289; Fax: +91 44 24911589

E-Mail: [thennarasu@gmail.com](mailto:thennarasu@gmail.com), [abmandal@hotmail.com](mailto:abmandal@hotmail.com)

| Table of contents                                                                                         | Page  |
|-----------------------------------------------------------------------------------------------------------|-------|
| <sup>1</sup> H- and <sup>13</sup> C-NMR spectra of fluorescent probe <b>1</b> (Figures S1-S2)             | S2-S3 |
| ESI-MS analytical data of fluorescent probe <b>1</b> (Figure S3)                                          | S4    |
| <sup>1</sup> H- and <sup>13</sup> C-NMR spectra of fluorescent probe <b>2</b> (Figures S4-S5)             | S5-S6 |
| ESI-MS analytical data of fluorescent probe <b>2</b> (Figure S6)                                          | S7    |
| Metal ion selectivity of <b>2</b> in presence of other metal ions (Figure S7)                             | S8    |
| The linear range of detection using fluorescent probe <b>2</b> (Figure S8)                                | S9    |
| ESI-MS analytical data of <b>2</b> -Cu <sup>2+</sup> complex (Figure S9)                                  | S10   |
| pH dependent variation in the fluorescence intensity of <b>2</b> (Figure S10)                             | S11   |
| Metal ion selectivity of <b>2</b> in presence of various amino acids (Figure S11)                         | S12   |
| Comparative account of the characteristics of probe <b>2</b> and other Cu <sup>2+</sup> probes (Table S1) | S13   |

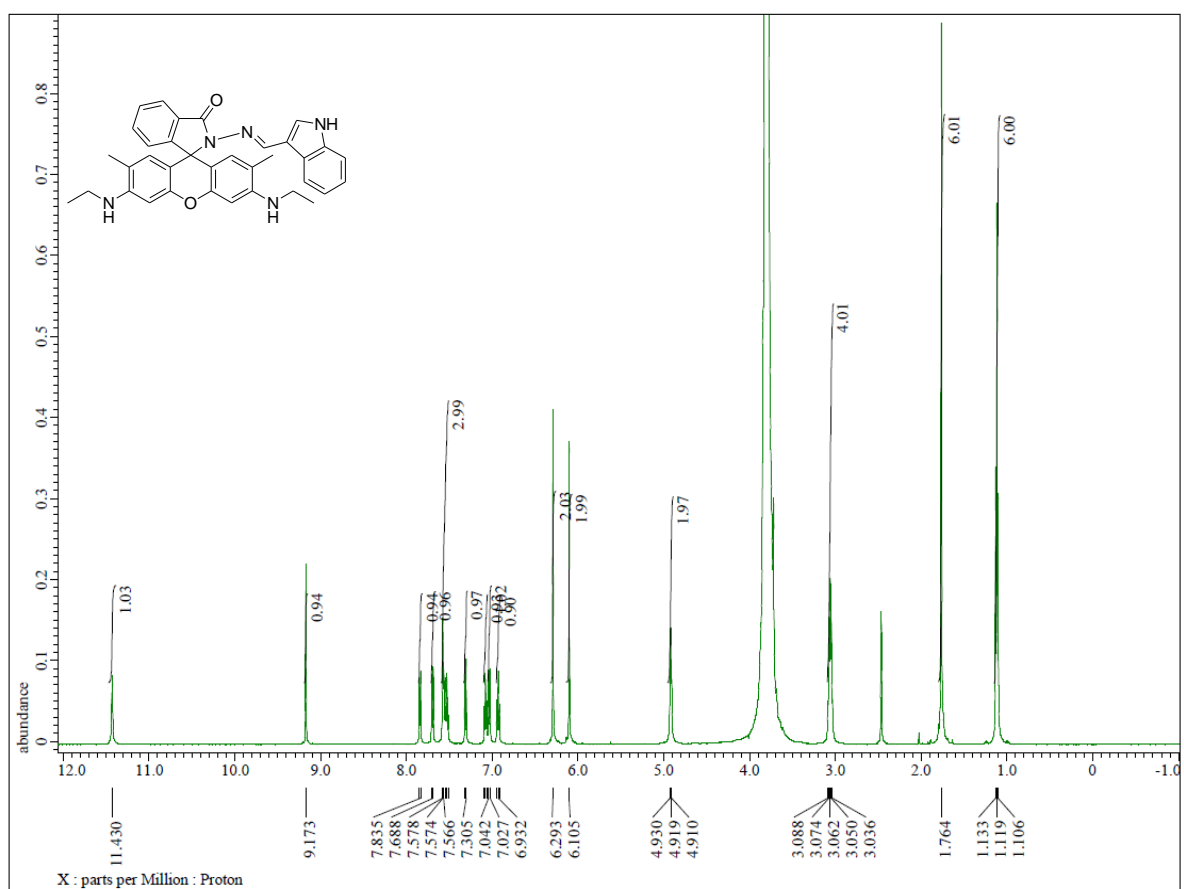

**Fig. S1.**  $^1\text{H}$  NMR spectrum of **1** in  $\text{DMSO-}d_6$

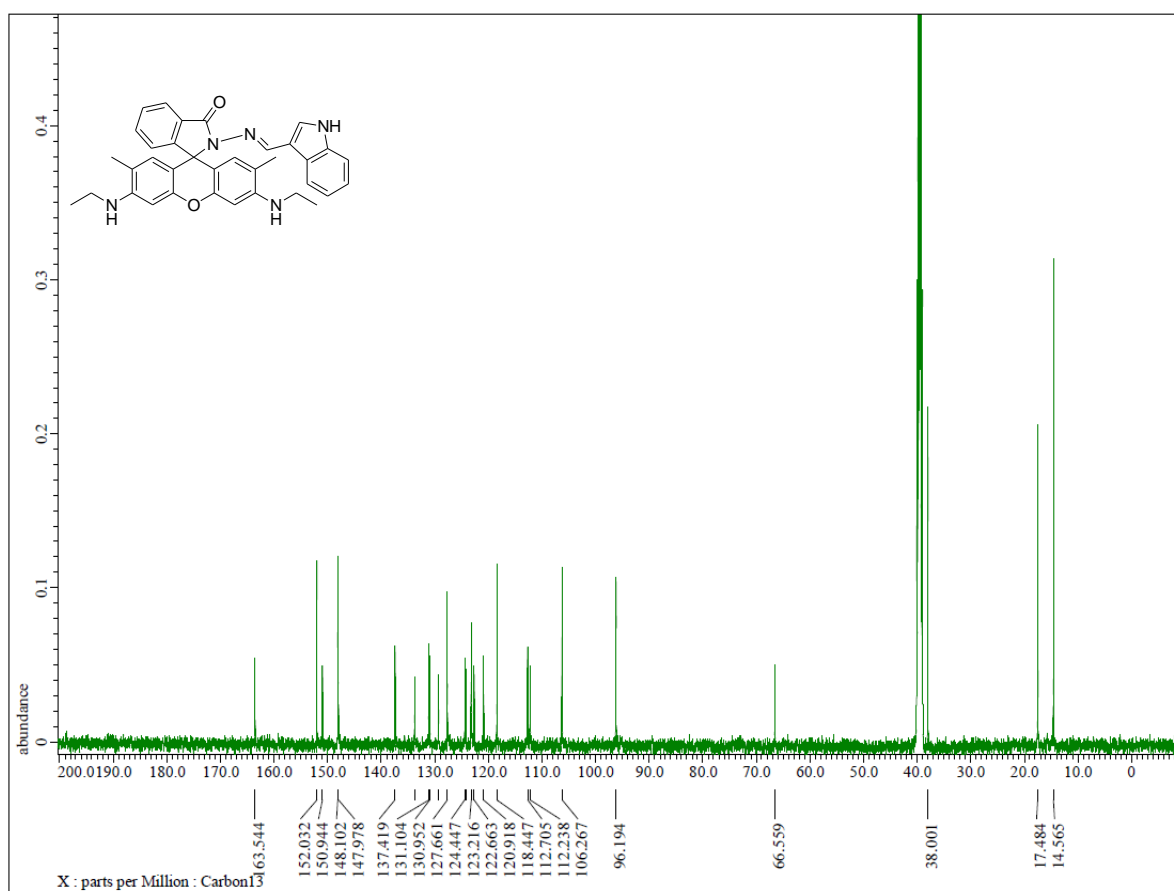

Fig. S2.  $^{13}\text{C}$  NMR spectrum of **1** in  $\text{DMSO-}d_6$

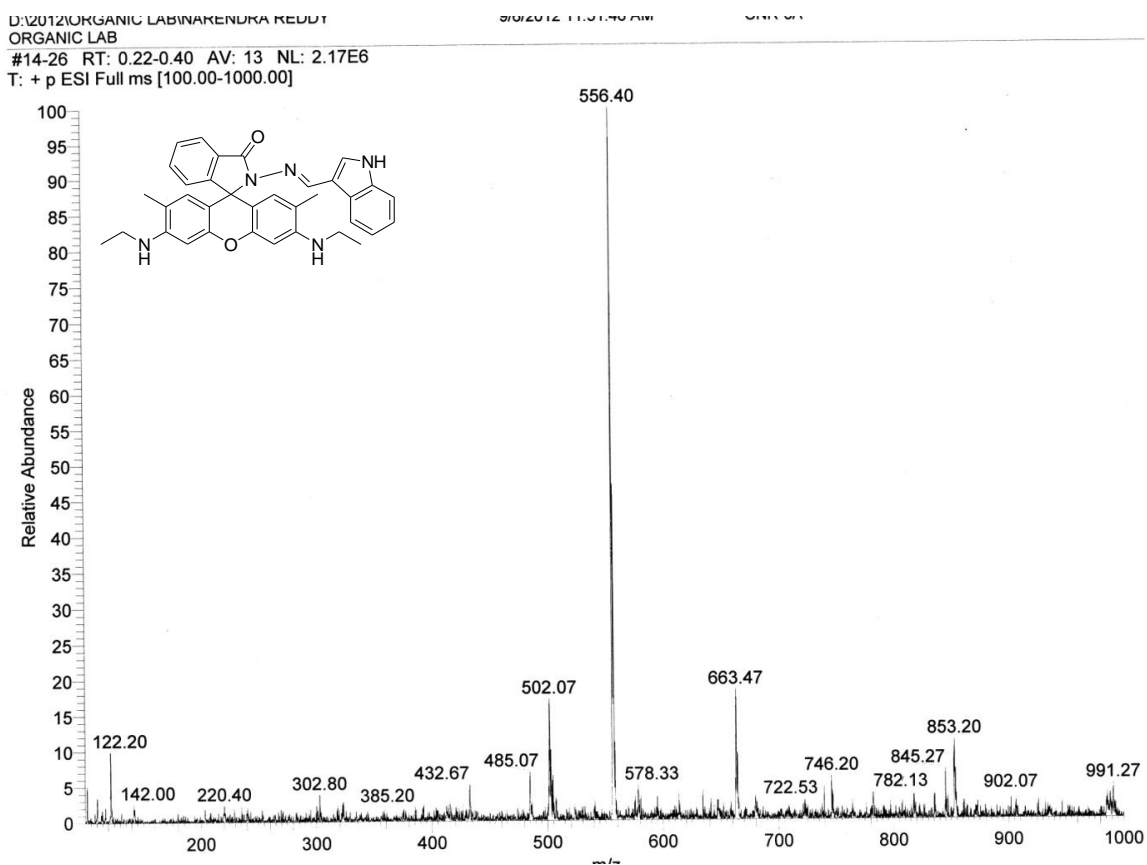

**Fig. S3.** ESI Mass spectrum of **1**

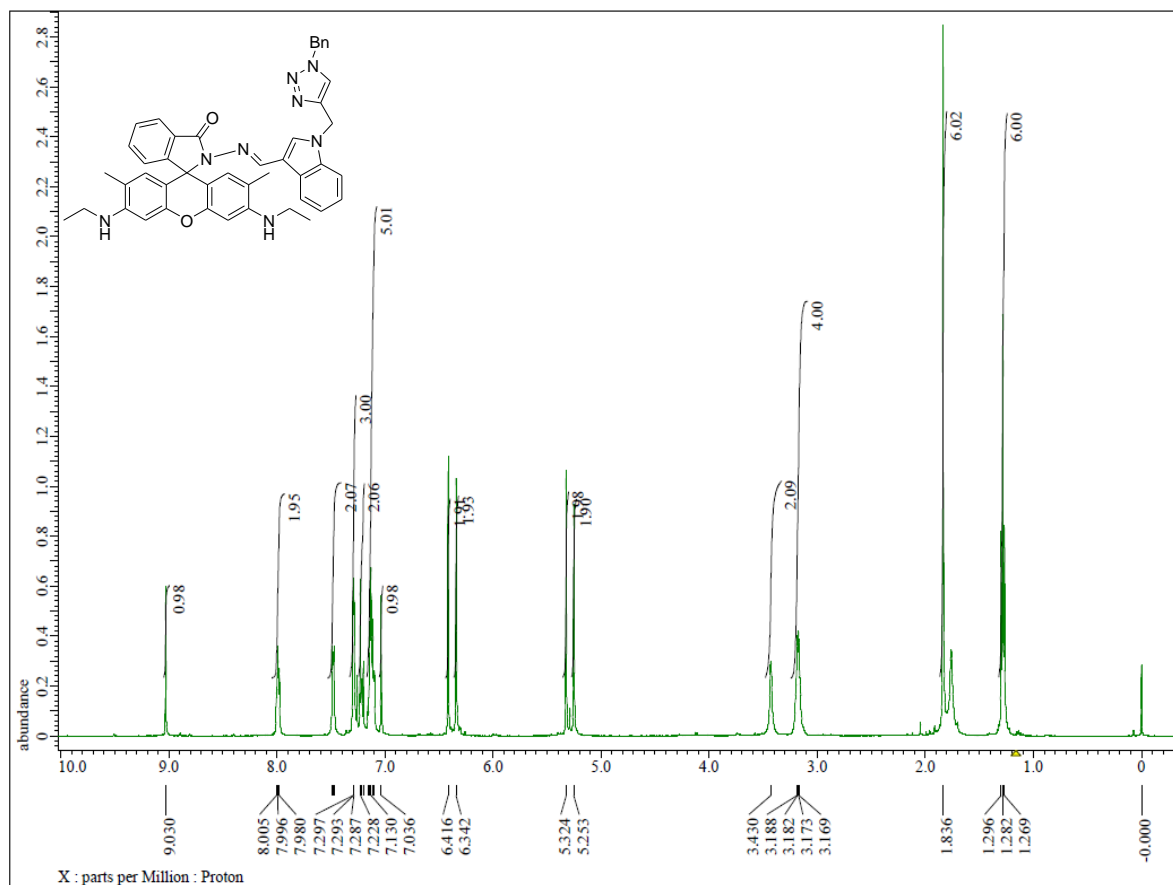

**Fig. S4.** <sup>1</sup>H NMR spectrum of **2** in CDCl<sub>3</sub>

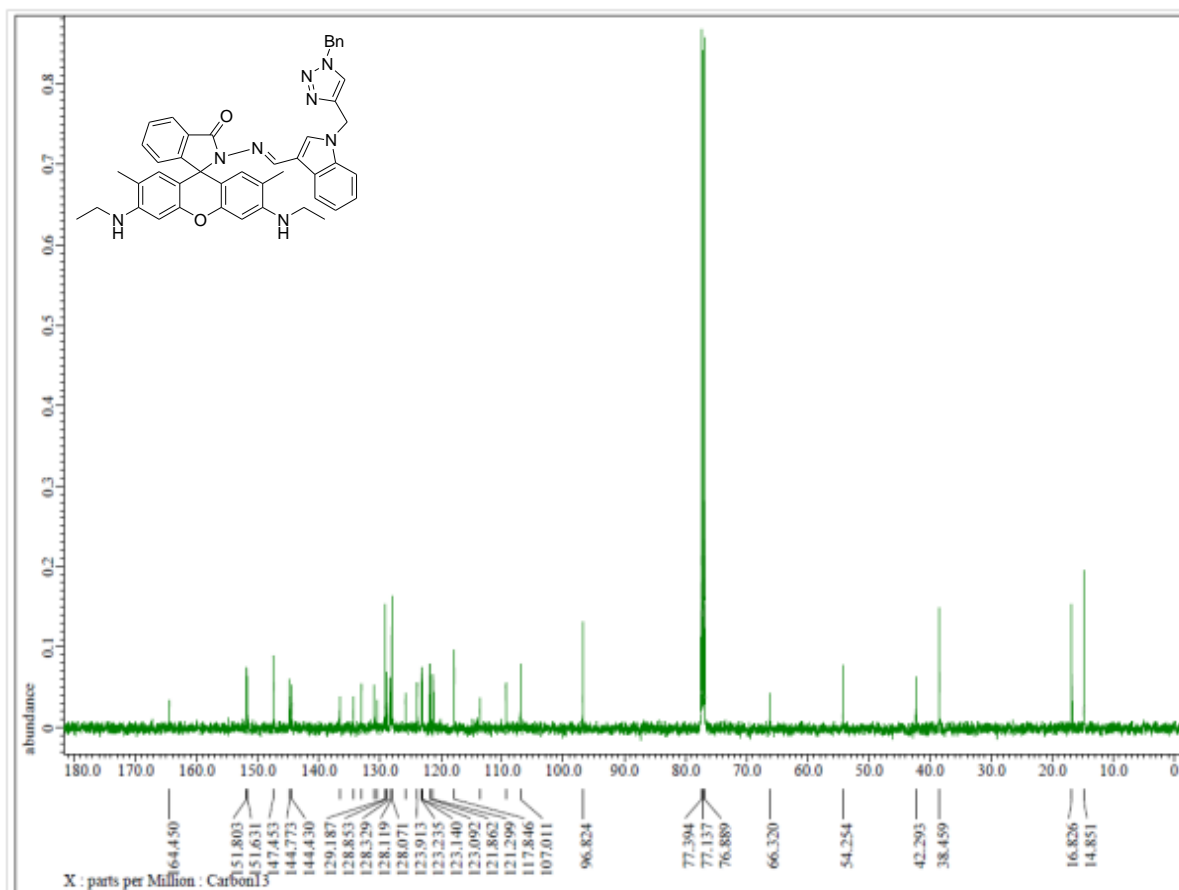

Fig. S5.  $^{13}\text{C}$  NMR spectrum of **2** in  $\text{CDCl}_3$

D:\2012\ORGANIC LAB\WARENDRA REDDY\CNR-7  
ORGANIC LAB

3/7/2012 9:51:36 AM

CNR-7

CNR-7 #9-12 RT: 0.24-0.32 AV: 4 NL: 4.28E6  
T: + p ESI Full ms [100.00-2000.00]

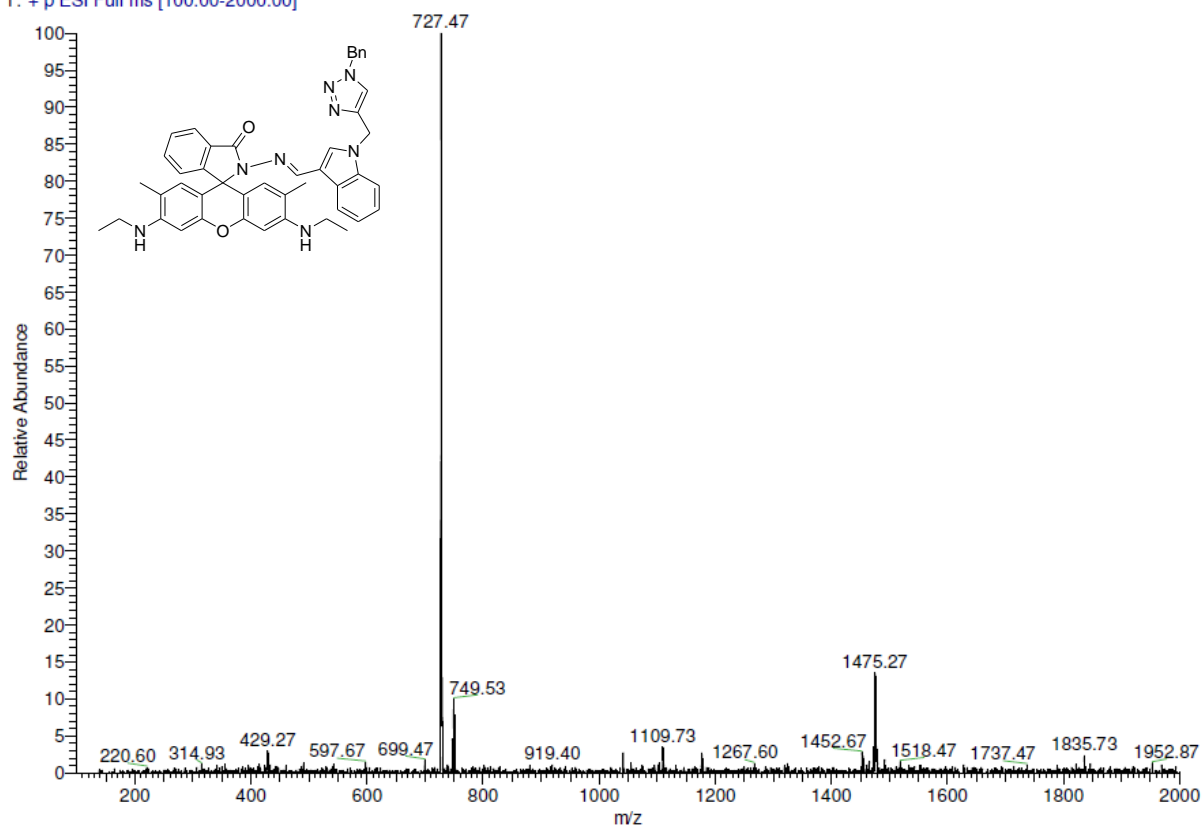

**Fig. S6.** ESI Mass spectrum of **2**

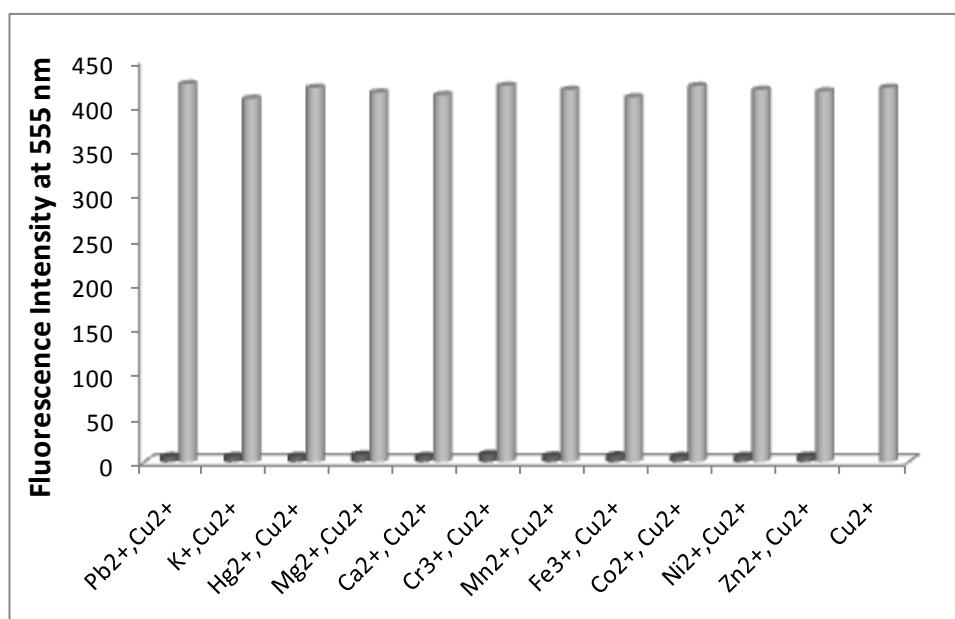

**Fig. S7.** Metal-ion selectivity of **2** (10 μM) in 1:1 v/v 0.01M Tris HCl-CH<sub>3</sub>CN, pH 7.4. The dark bars represent the fluorescence emission of a solution of **2** (10 μM) and 5 equiv of the cation of interest. The light bars show the fluorescence change that occurs upon addition of 1 equiv of Cu(II) to the solution containing **2** (10 μM) and the cation (50 μM).



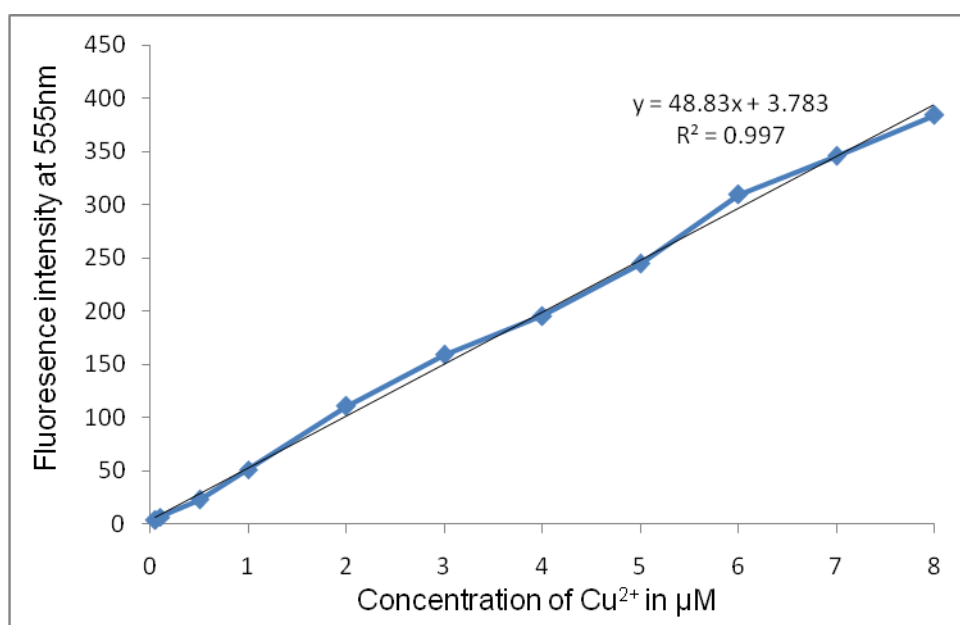

**Fig. S8.** The linear range of detection using fluorescent probe 2

D:\2012...NARENDRA REDDY\CNR-7-Cu  
ORGANIC LAB

3/7/2012 9:55:37 AM

CNR-7-Cu

CNR-7-Cu #12 RT: 0.31 AV: 1 NL: 1.34E7

T: +p ESI Full ms [100.00-2000.00]

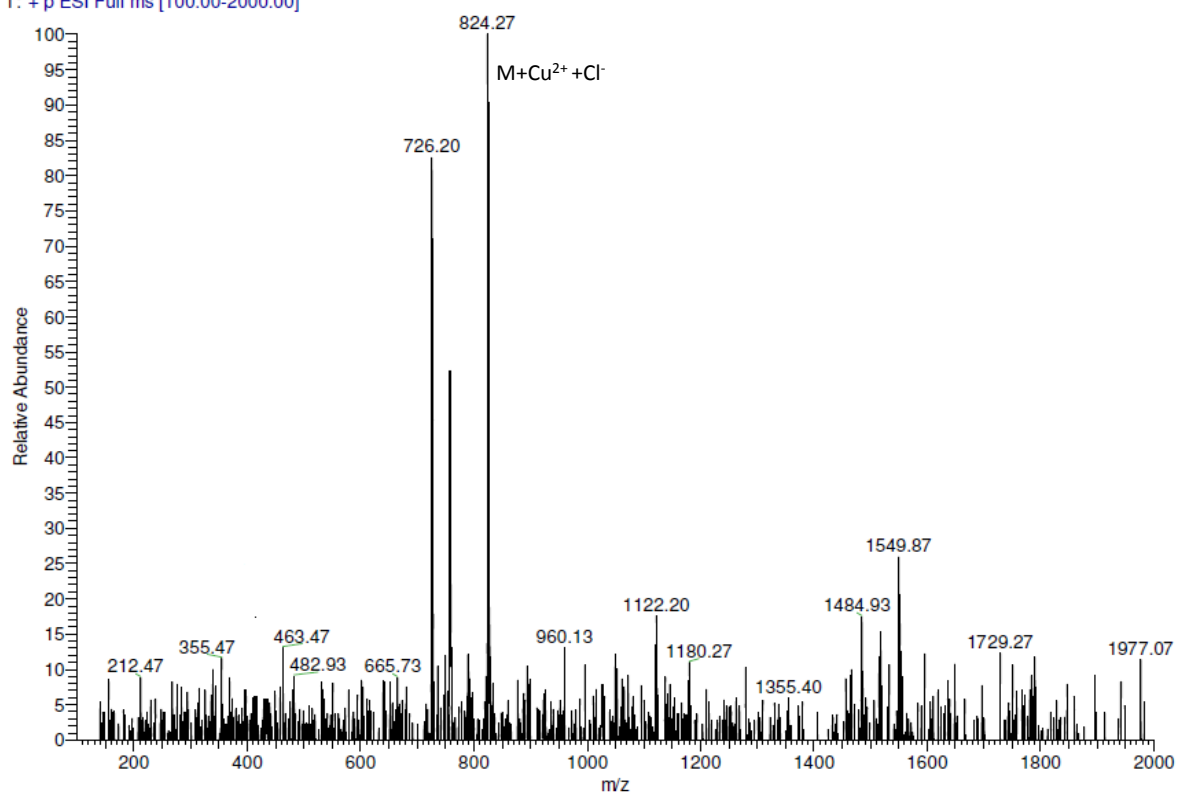

**Fig. S9.** ESI Mass spectrum of 2-Cu<sup>2+</sup> complex

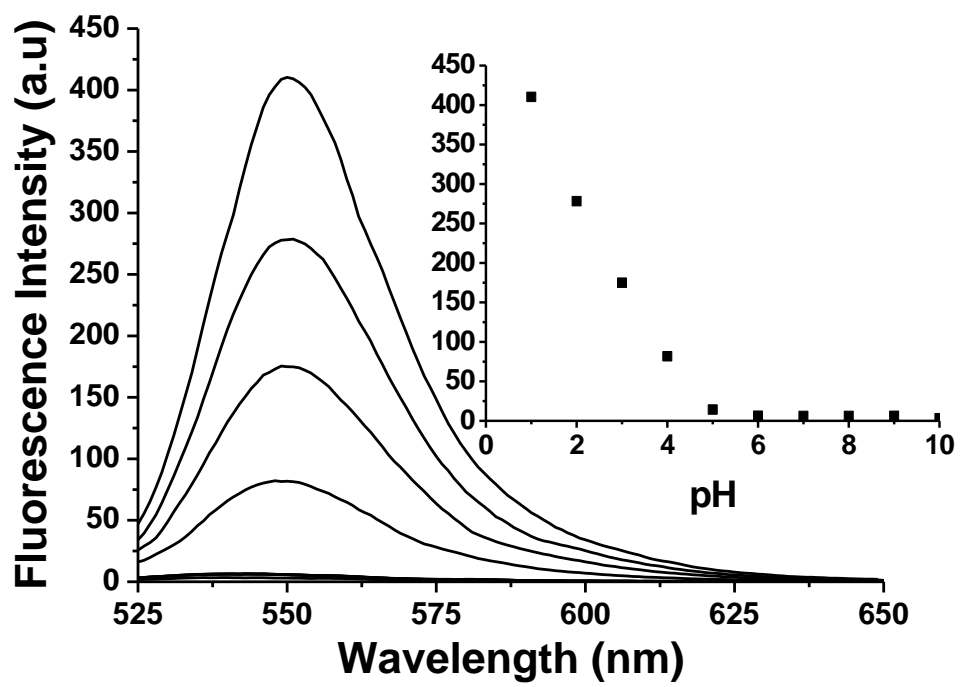

**Fig. S10.** pH dependant variation in fluorescence intensity of **2** (10  $\mu$ M).

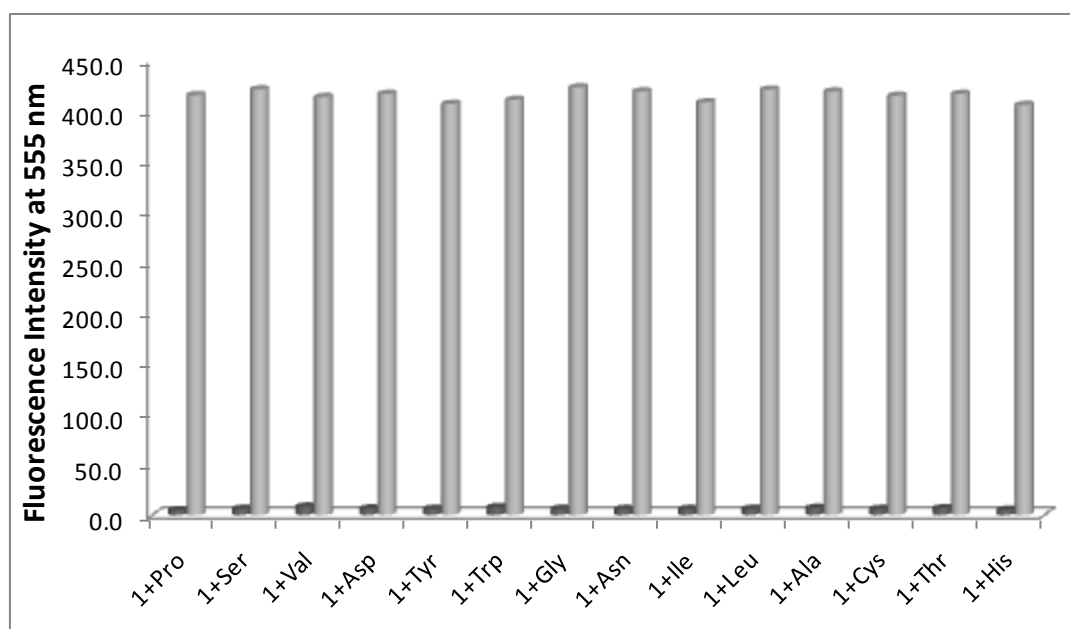

**Fig. S11.** Cu<sup>2+</sup> ion selectivity of **2** (10 μM) in 1:1v/v 0.01M Tris HCl-CH<sub>3</sub>CN, pH 7.4 in the presence of various amino acids. The dark bars represent the fluorescence emission intensity of **2** (10 μM) and 5 equiv of the amino acid of interest. The grey bars show the fluorescence emission intensity upon addition of 1.0 equiv. of Cu<sup>2+</sup> to the solution of **2** (10 μM) and 5.0 equiv. of the amino acid of interest.

**Table S1.** Comparative account of the characteristics of probe **2** and other Cu<sup>2+</sup> probes

| Cu <sup>2+</sup> Sensor | Reversibility | Competing metal ion(s)              | Linear range (μM) | Detection limit (μM) | Remarks                                                                                                                           |
|-------------------------|---------------|-------------------------------------|-------------------|----------------------|-----------------------------------------------------------------------------------------------------------------------------------|
| Ref 1                   | NA            | Co <sup>2+</sup>                    | 0.1-70            | 0.23                 | Interference from other metal ions                                                                                                |
| Ref 2                   | Irreversible  | -                                   | 2.5-35            | 1.8                  | Large response time (8 min) and high detection limit                                                                              |
| Ref 3                   | Reversible    | -                                   | 0.1-1             | 0.045                | narrow linear range of detection                                                                                                  |
| Ref 4                   | Irreversible  | -                                   | 0.08-30           | 0.013                | Low excitation wavelength (365 nm) may be harmful to living organisms                                                             |
| Ref 5                   | Irreversible  | Cr <sup>3+</sup> , Hg <sup>2+</sup> | -                 | 0.3                  | Interference from other metal ions                                                                                                |
| Ref 6                   | NA            | Fe <sup>3+</sup> , Hg <sup>2+</sup> | -                 | -                    | Interference from other metal ions                                                                                                |
| This work               | Reversible    | -                                   | 0.05-8            | 0.03                 | No interference from other metal ions; Wide linear range of detection; Low detection limit; Excitation in visible region (525 nm) |

### References

- [1]. W. -Y. Liu, H. -Y. Li, H. -S. Lv, B. -X. Zhao and J. -Y. Miao, *Spectrochim. Acta A*, 2012, **95**, 658.
- [2]. J. Wang, H. Li, L. Long, G. Xiao and D. Xie, *J. Lumin.*, 2012, **132**, 2456.
- [3]. J. Zhang, C. Yu, S. Qian, G. Lu and J. Chen, *Dyes Pigm.*, 2012, **92**, 1370.
- [4]. L. Yuan, W. Lin, B. Chen and Y. Xie, *Org. Lett.*, 2012, **14**, 432.
- [5]. L. Huang, F. -P. Hou, P. Xi, D. Bai, M. Xu, Z. Li, G. Xie, Y. Shi, H. Liu and Z. Zeng, *J. Inorg. Biochem.*, 2011, **105**, 800.
- [6]. L. Wang, J. Yan, W. Qin, W. Liu and R. Wang, *Dyes Pigm.*, 2012, **92**, 1083.
